# Supplementary material for: Optical Biomarkers of Serous and Mucinous Human Ovarian Tumor Assessed with Nonlinear Optics Microscopies
Source: PLoS One. 2012 Oct 8;7(10):e47007. doi: 10.1371/journal.pone.0047007 (PMC3466244; doi:10.1371/journal.pone.0047007)
Supplement: Table S2 — Quantitative variables for differentiating normal, serous and mucinous ovarian samples with integrated nonlinear microscopy techniques. (DOC) [file pone.0047007.s003.doc]

Table S2: Quantitative variables for differentiating normal, serous and mucinous ovarian samples with integrated nonlinear microscopy techniques

|  |  | **Ovarian Stroma** | | | **Ovarian Epithelium** | | | | |
| --- | --- | --- | --- | --- | --- | --- | --- | --- | --- |
| **TYPE** |  | **Texture** | | | **Morphology** | | **Lifetime** | | |
|  |  | U | H | E | Rf | K | 1(ns) | 2(ns) | a1 (%) |
| **NORMAL** |  | 0.670.29  (n=15)a | 0.770.14  (n=15)a | 6.260.31  (n=15)a | 0.870.02  (n=50)a | 0.70.2  (n=50)a | 0.530.15  (n=45)a | 2.040.35  (n=45)a | 75  (n=45)a |
| **SEROUS** | Ade.  Bord.  Adecarc | 0.370.04  (n=15)b,†  0.300.03  (n=15)b  0.210.06  (n=15)b | 0.600.18  (n=15)a  0.540.23  (n=15)b  0.520.18  (n=15)b | 6.890.91  (n=15)a  7.140.85  (n=15)b  7.400.58  (n=15)b | 0.830.04  (n=50)a,†  0.810.23  (n=50)a,†  0.720.31  (n=50)b,† | -1.30.1  (n=50)b,†  -0.20.1  (n=50)b,†  -0.70.3  (n=50)b | 0.460.07  (n=45)a,*,†  0.460.20  (n=45)a,†  0.850.15  (n=45)b | 1.450.26  (n=45)b,*,†  1.340.48  (n=45)b,*,†  2.120.39  (n=45)a | 80  (n=45)a  74  (n=45)a  70  (n=45)a |
| **MUCINOUS** | Ade.  Bord.  Adecar | 0.790.26  (n=15)a,*  0.380.16  (n=15)b  0.280.15  (n=15)b | 0.790.11  (n=15)a,*  0.660.13  (n=15)a  0.590.22  (n=15)a | 6.240.39  (n=15)a,*  6.580.64  (n=15)a  7.070.75  (n=15)b | 0.690.02  (n=50)b,*  0.610.14  (n=50)b  0.500.12  (n=50)b | -1.00.2  (n=50)b  -0.80.5  (n=50)b  -0.50.4  (n=50)b | 0.790.17  (n=45)b  0.910.21  (n=45)b  0.910.35  (n=45)b | 2.170.36  (n=45)a  2.260.47  (n=45)a  2.150.55  (n=45)a | 71  (n=45)a  70  (n=45)a  67  (n=45)a |

Note: The average and SD of each of the variables for normal, serous and mucinous samples. The number *n* of samples or ROIs from which these parameters were extracted, indicated in parentheses, is defined as:

TEXTURE (n=15): 3 ROI (200x200) were used from each image. In total we used 5 images for each type of tissue, MORPHOLOGY (n=50): 10 nuclei were taken from each image. In total we used 5 images for each type of tissue, LIFETIME (n=45): 15 pixels (epithelial cells) were taken from each image. In total we used 3 images of each type of tissue.

Within a column, values with different superscript letters are statistically different (at least P < 0.05) and values with the same superscript letter are statistically similar (P > 0.05) compared with normal samples. * indicates a statistically significant (p < 0.05) difference comparison within serous tumor or within mucinous tumor. † indicates a statistically significant (p < 0.05) difference between serous and mucinous tumor with same diagnosis; following ANOVA analysis.

Abbreviations: Ade., adenoma, Bord., borderline, Adecarc., adenocarcinoma, U., uniformity, H., homogeneity, E., entropy, Rf., nuclear roundness factor and K., kurtosis.
